# Supplementary material for: Porous Zirconia/Magnesia Ceramics Support Osteogenic Potential In Vitro
Source: MDPI journal article supplement (doi:10.3390/ma14041049), 2021-02-23
Supplement: s1 [file s1]

Article

# Porous Zirconia/Magnesia Ceramics Support Osteogenic Potential In Vitro

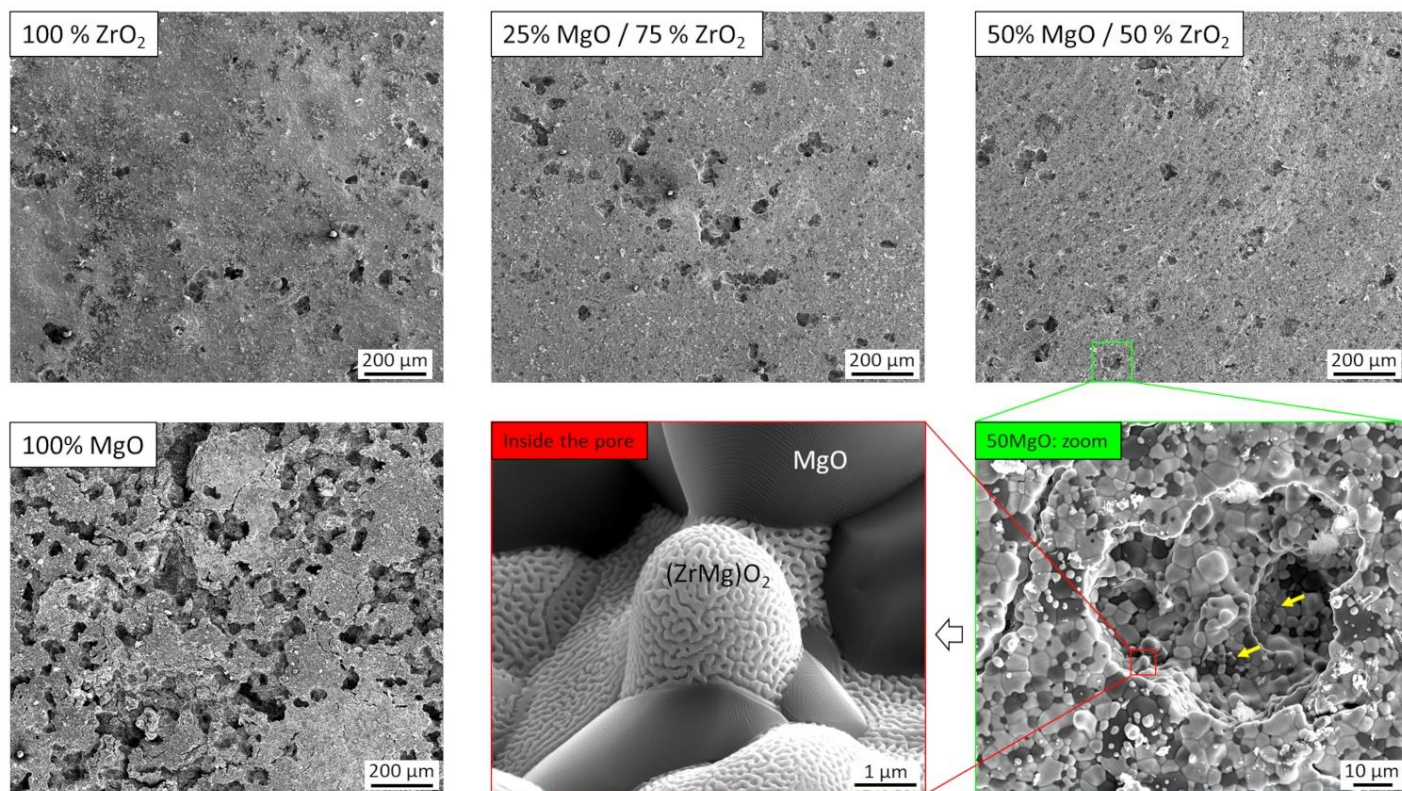

**Figure S1.** SEM micrographs of ZrO<sub>2</sub>/MgO ceramics with a pore size of 50–60 μm. In the samples Figure 2. were detected (see text). In agreement to Scheme 2.

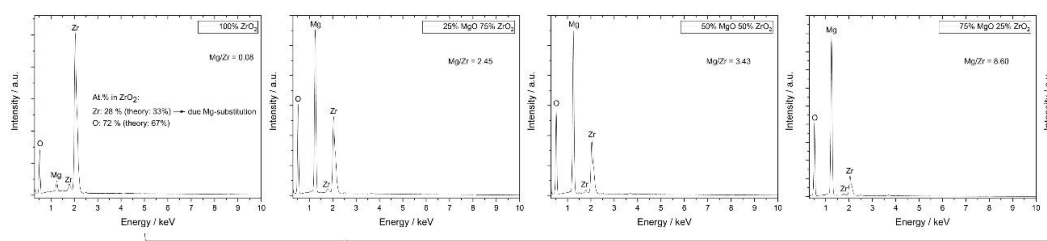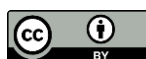

**Copyright:** © 2021 by the authors. Licensee MDPI, Basel, Switzerland. This article is an open access article distributed under the terms and conditions of the Creative Commons Attribution (CC BY) license (<http://creativecommons.org/licenses/by/4.0/>).

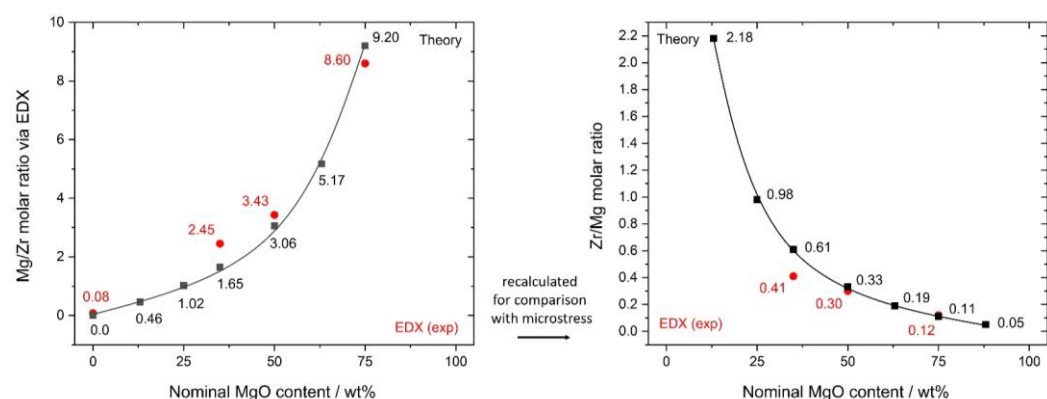

**Figure S2.** EDX spectra of  $\text{ZrO}_2 / \text{MgO}$  ceramics (**top**) with determined molar  $\text{Mg}/\text{Zr}$  (**bottom, left**) and  $\text{Zr}/\text{Mg}$  (**bottom, right**) ratios in a good agreement to the nominal compositions and theoretical values. To verify a slight deviation in the composition (nominal 25 wt.%  $\text{MgO}$ ) from the linear rule determined by XRD (Figure S3, left), AAS measurements of in  $\text{H}_2\text{SO}_4$  acid dissolved ceramics were performed and the same discrepancy was found (Figure S3, right).

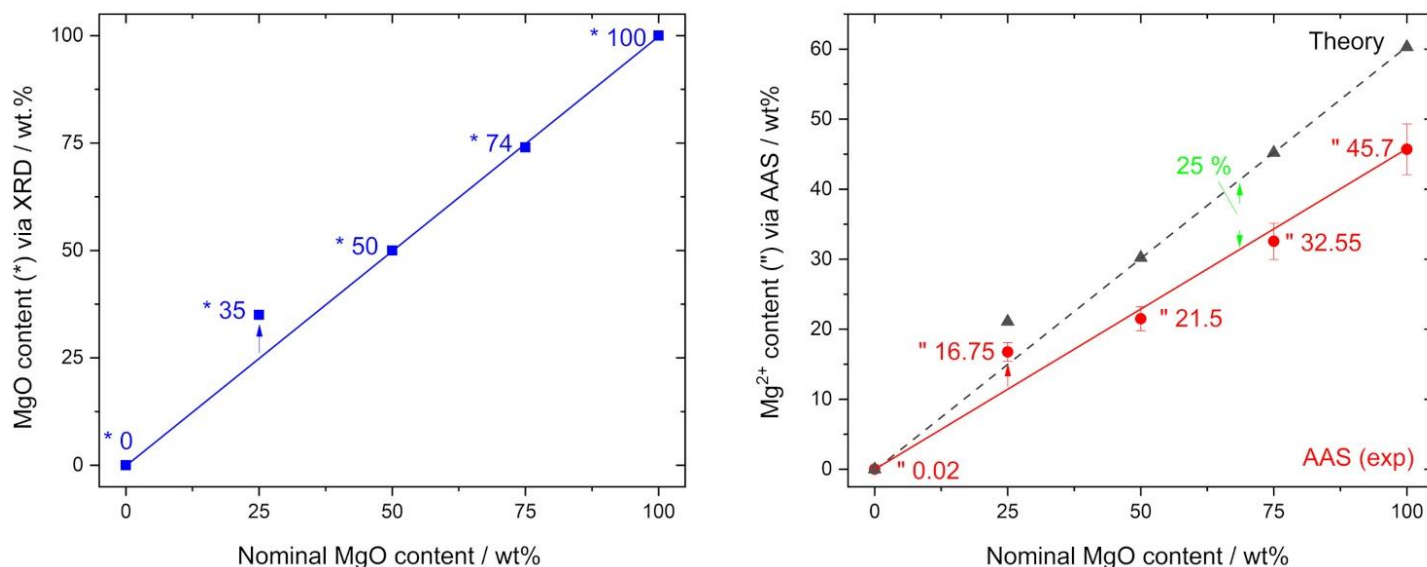

**Figure S3.**  $\text{MgO}$  (\*) and  $\text{Mg}^{2+}$  (") content in the  $\text{ZrO}_2 / \text{MgO}$  ceramics was determined by Rietveld refinement in XRD (**left**) and AAS (**right**), respectively. Note: a slight deviation from the linear rule (nominal 25 wt.%  $\text{MgO}$ ) is shown by labeled arrows in both XRD and AAS.
